# Supplementary figures and images for: A fluorous-phase oxygen optical nanosensor for mitigating redox-active microbial metabolite interference
Source: Royal Society of Chemistry journal article supplement (doi:10.1039/d6an00043f), 2026-06-15

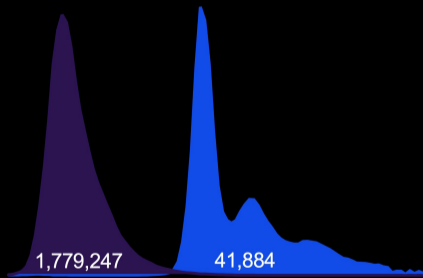

Supplement: d6an00043f10.pdf [file d6an00043f10.pdf]

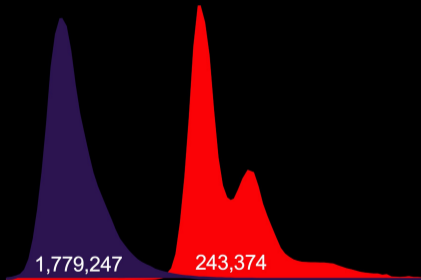

Supplement: d6an00043f11.pdf [file d6an00043f11.pdf]

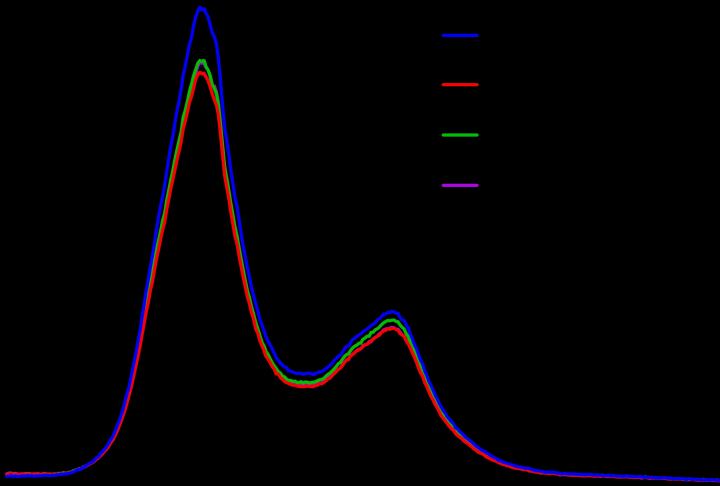

Supplement: d6an00043f18.pdf [file d6an00043f18.pdf]

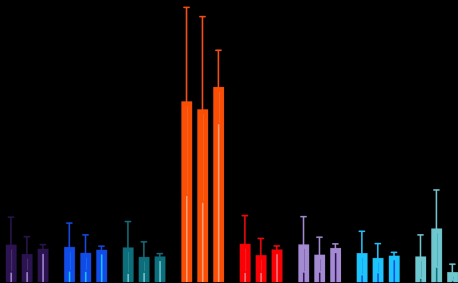

Supplement: d6an00043f3.pdf [file d6an00043f3.pdf]

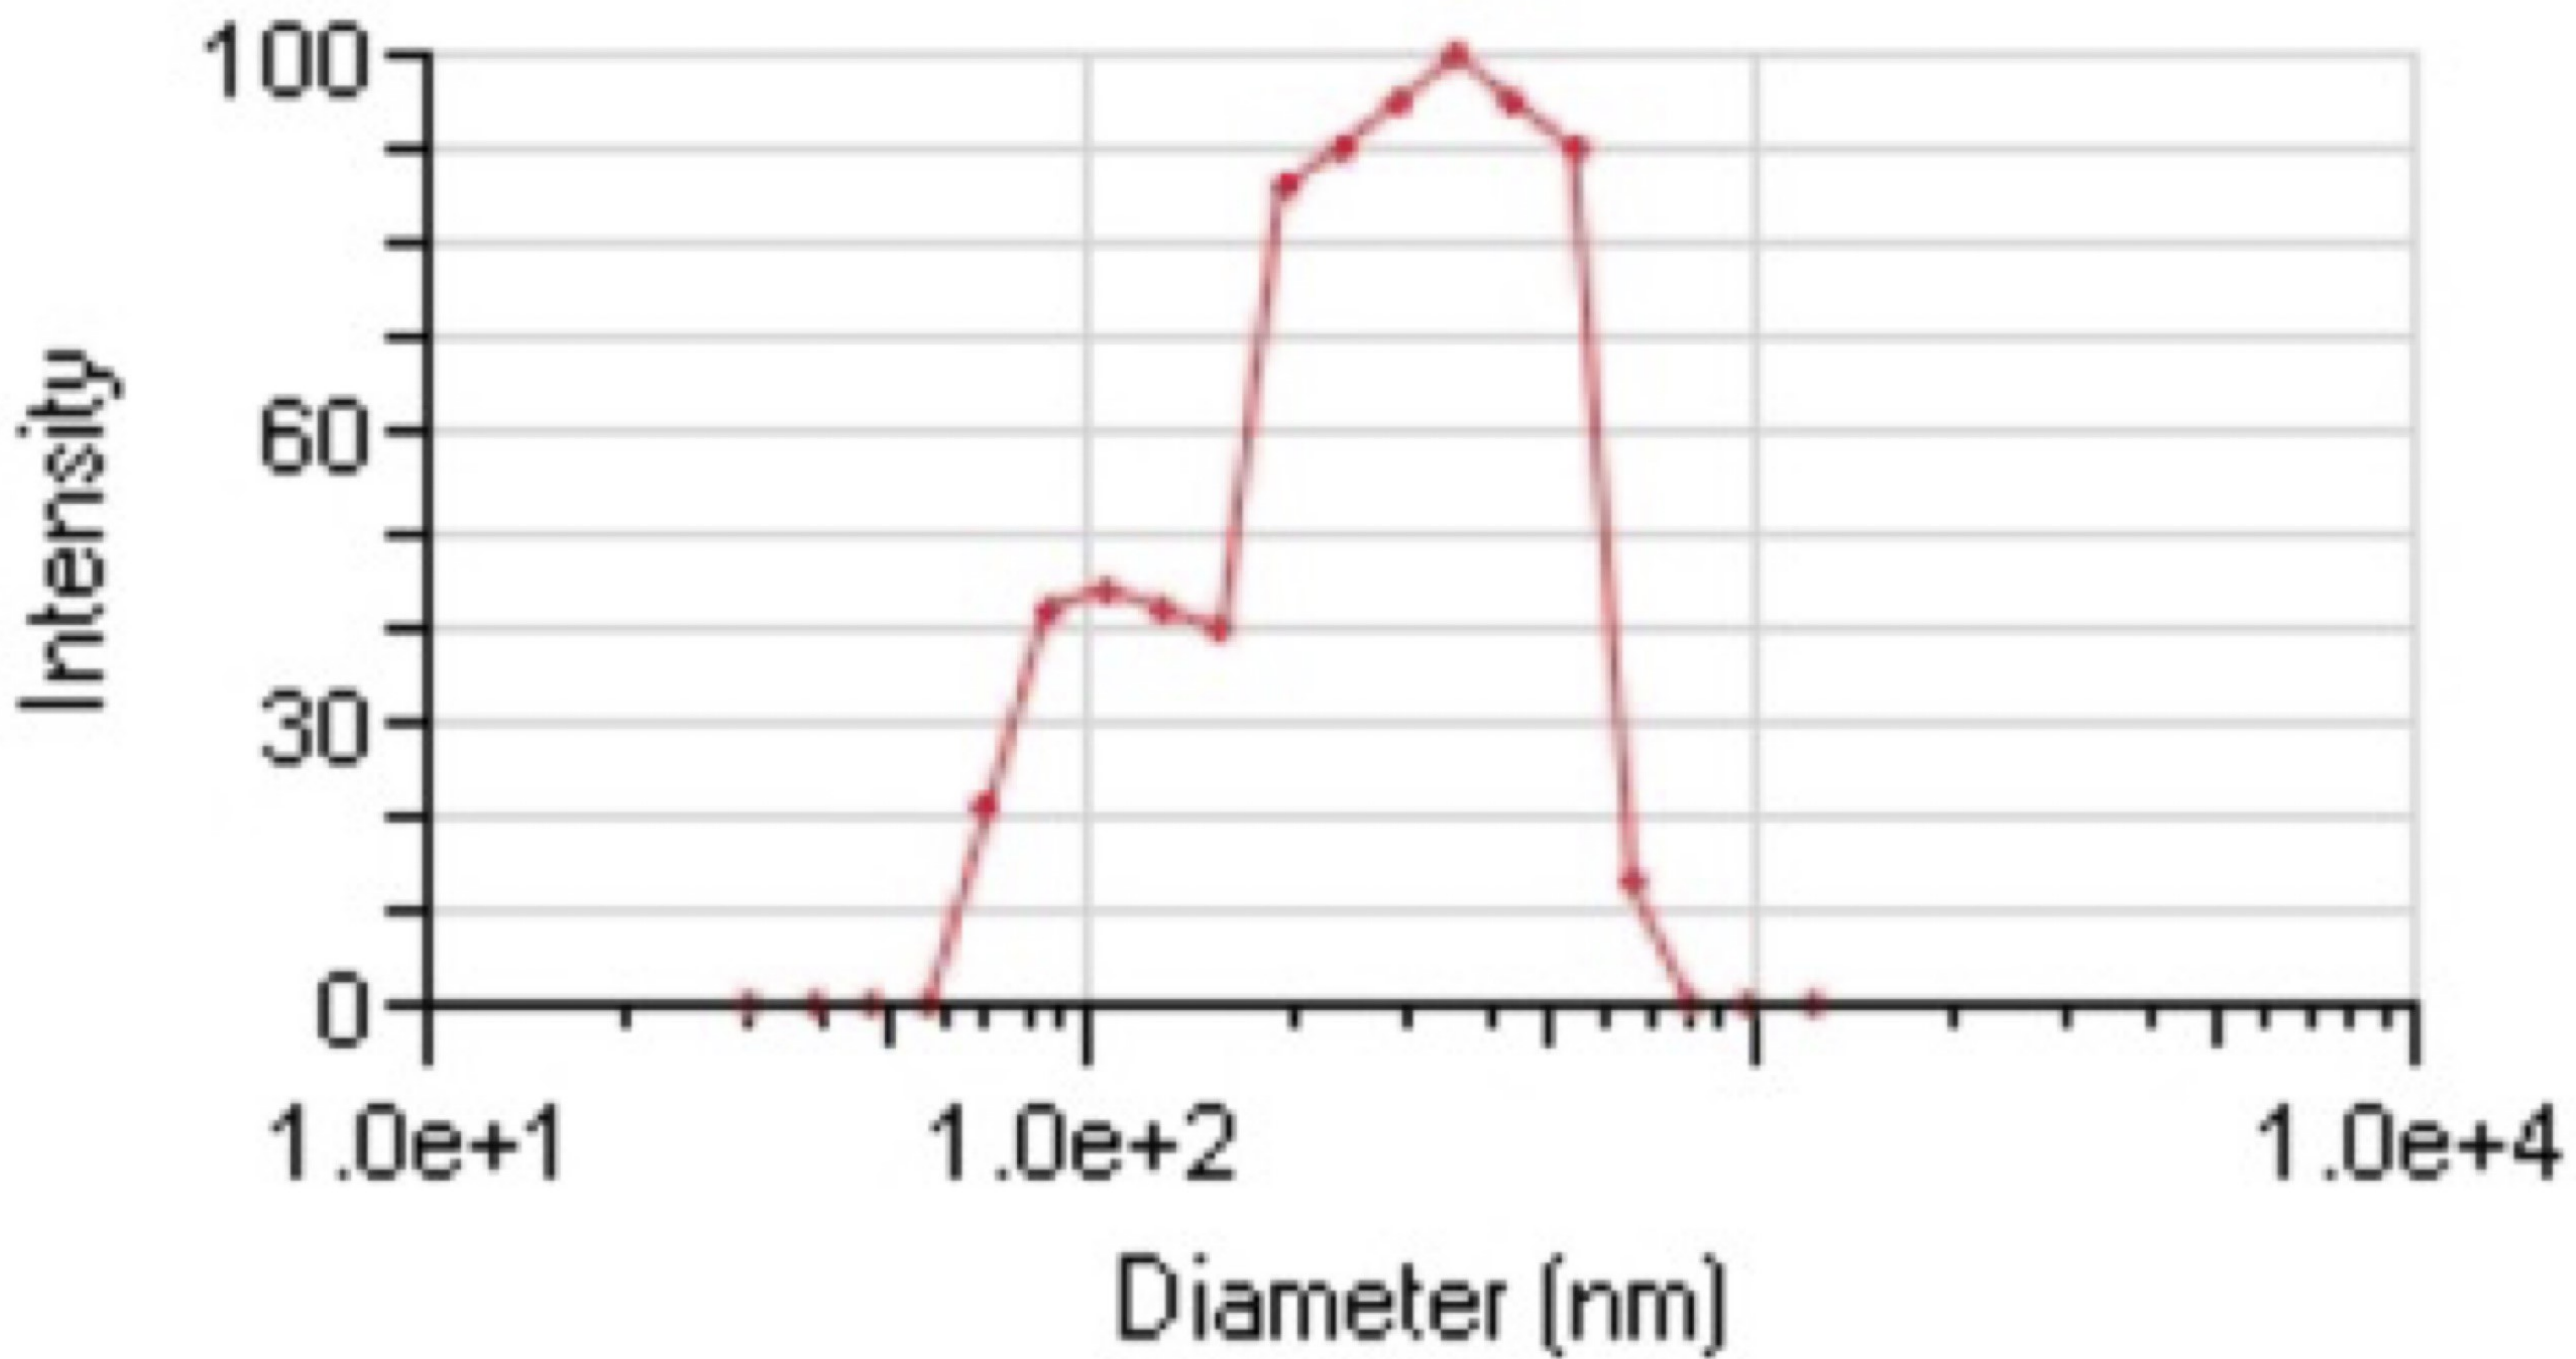

Supplement: d6an00043f7.pdf [file d6an00043f7.pdf]
